# Supplementary material for: The negative emission potential of alkaline materials
Source: PubMed Central journal article supplement (PMC6438983; doi:10.1038/s41467-019-09475-5), 2019-03-28
Supplement: 41467_2019_9475_MOESM3_ESM.pdf [file 41467_2019_9475_MOESM3_ESM.pdf]

## **Description of Additional Supplementary Information**

File Name: Supplementary Data 1

Description: Total CO2 draw-down for alkaline materials: Mineral Carbonation

File Name: Supplementary Data 2

Description: Total CO2 draw-down for alkaline materials: Enhanced Weathering

File Name: Supplementary Data 3

Description: Aluminium and red mud production

File Name: Supplementary Data 4

Description: Cement and by-products production

File Name: Supplementary Data 5

Description: Biomass, coal and ash production

File Name: Supplementary Data 6

Description: Steel and slag production

File Name: Supplementary Data 7

Description: Lime production

File Name: Supplementary Data 8

Description: Nickel and nickel tailings production

File Name: Supplementary Data 9

Description: PGM and PGM tailings production
